# Supplementary material for: External kinetics of the kettlebell snatch in amateur lifters
Source: PeerJ. 2017 Mar 29;5:e3111. doi: 10.7717/peerj.3111 (PMC5374970; doi:10.7717/peerj.3111)
Supplement: Supplemental Information 1 [file peerj-05-3111-s001.xlsx]

## Sheet: Tables 1&2
	Absolute GRF of first 14 repetitions				Absolute GRF of last 14 repetitions				GRF (normalised) of first 14 repetitions				GRF (normalised) of last 14 repetitions
Subject	GRF (N)	GRF x (N)	GRF y (N)	GRF z (N)	GRF (N)	GRF x (N)	GRF y (N)	GRF z (N)	GRF (N)	GRF x (N)	GRF y (N)	GRF z (N)	GRF (N)	GRF x (N)	GRF y (N)	GRF z (N)
1	1667.57	16.0851	321.122	1636.13	1655.44	1.00526	397.191	1605.56	2.1012	0.0202678	0.404624	2.06157	2.08591	0.00126666	0.500475	2.02307
2	2337.13	121.438	427.828	2296.81	2336.23	87.6344	449.611	2292.1	2.63831	0.137087	0.482961	2.5928	2.63729	0.0989277	0.507552	2.58748
3	1808.9	30.2436	342.707	1776.01	1764.53	74.5035	290.298	1739.93	2.4423	0.0408336	0.462708	2.39789	2.3824	0.100591	0.391948	2.34918
4	1351.16	60.4169	126.72	1341.37	1330.2	22.1997	131.948	1322.91	1.69413	0.0757529	0.158887	1.68185	1.66785	0.0278348	0.16544	1.65871
5	1919.4	22.879	343.079	1888.15	1925.5	26.1876	347.901	1893.26	2.25672	0.0268997	0.403372	2.21998	2.26389	0.0307898	0.409042	2.22599
6	1560.28	94.2232	249.721	1536.71	1660.81	100.711	279.437	1631.81	1.87118	0.112998	0.299479	1.84291	1.99174	0.120778	0.335117	1.95696
7	1649.34	66.9648	284.94	1620.35	1656.45	55.2279	315.593	1624.03	1.5174	0.0616081	0.262147	1.49074	1.52394	0.05081	0.290348	1.49412
8	1859.01	81.6834	358.063	1823.89	1992.55	128.061	432.956	1944.55	2.20607	0.096933	0.42491	2.16439	2.36455	0.151969	0.513785	2.30758
9	2135.05	84.0298	303.537	2110.59	2118.55	83.1797	270.742	2095.26	1.98396	0.115753	0.282057	1.96123	1.96863	0.114582	0.251582	1.94699
10	1643.69	76.2969	260.834	1620.06	1649.08	83.867	230.043	1632.52	1.98287	0.0708975	0.314658	1.95436	1.98937	0.0779319	0.277513	1.9694
11	1887.82	103.642	365.174	1843.65	2002.23	-2.23429	384.076	1963.54	2.19178	0.124733	0.423972	2.1405	2.32462	-0.00268898	0.445917	2.27969
12	1477.57	79.5621	209.514	1461.62	1476.17	96.8836	248.777	1450.99	2.02717	0.0923725	0.287445	2.00529	2.02525	0.112483	0.341313	1.9907

## Sheet: Tables 3&4
	Absolute Ipsilateral UP					Absolute Ipsilateral DOWN					Absolute Contralateral UP					Absolute Contralateral DOWN					(normalised) Ipsilateral UP					(normalised) Ipsilateral DOWN					(normalised) Contralateral UP					(normalised) Contralateral DOWN
Subject	GRF (N)	GRF x (N)	GRF y (N)	GRF z (N)	Impulse (N·s)	GRF (N)	GRF x (N)	GRF y (N)	GRF z (N)	Impulse (N·s)	GRF (N)	GRF x (N)	GRF y (N)	GRF z (N)	Impulse (N·s)	GRF (N)	GRF x (N)	GRF y (N)	GRF z (N)	Impulse (N·s)	GRF (N)	GRF x (N)	GRF y (N)	GRF z (N)	Impulse (N·s)	GRF (N)	GRF x (N)	GRF y (N)	GRF z (N)	Impulse (N·s)	GRF (N)	GRF x (N)	GRF y (N)	GRF z (N)	Impulse (N·s)	GRF (N)	GRF x (N)	GRF y (N)	GRF z (N)	Impulse (N·s)
1	837.721	33.9918	171.18	817.457	341.838	956.837	23.9663	170.419	940.407	388.528	854.706	30.4379	178.944	834.814	393.563	787.847	35.4325	160.678	770.505	368.245	1.05556	0.0428309	0.215693	1.03002	0.455106	1.0233	-0.000887767	0.188097	1.00389	0.434104	0.996651	0.0618279	0.158927	0.982791	0.413999	0.961961	0.0459368	0.157989	0.947696	0.432715
2	1076.91	35.6144	234.408	1049.97	439.36	1071.2	40.3221	237.46	1039.78	377.81	1119.25	19.4992	185.696	1102.95	389.959	1244.6	92.4448	207.526	1226.45	373.267	1.21569	0.040204	0.264616	1.18528	0.468357	1.2181	0.0454727	0.267275	1.18374	0.435889	1.21847	0.0320237	0.218784	1.19732	0.439984	1.28835	0.0814154	0.231194	1.26623	0.409321
3	1102.33	51.735	171.174	936.084	334.6	792.596	22.8994	162.345	872.072	366.675	854.948	49.763	143.972	905.398	299.491	749.354	68.1148	157.155	912.386	295.474	1.48832	0.0613584	0.203682	1.09999	0.511193	1.15867	0.0220239	0.193285	1.01431	0.495146	1.28764	0.067902	0.159621	1.07017	0.484002	1.28001	0.089502	0.185238	1.06649	0.44605
4	830.787	40.1428	112.501	819.69	323.104	989.011	23.3227	96.4071	976.296	341.292	765.315	7.38804	65.1404	762.142	265.777	886.4	112.396	77.7927	882.593	266.115	1.04167	0.0503325	0.141058	1.02776	0.422641	1.14012	0.0300077	0.154066	1.12099	0.46199	1.02576	-0.00117459	0.134056	1.0147	0.35216	1.05859	0.105101	0.129521	1.04927	0.326126
5	869.908	20.0105	138.631	857.338	392.072	762.73	63.4766	132.509	749.315	402.043	1065.03	42.9404	175.847	1048.8	389.561	1035.08	45.4583	164.912	1021.4	343.658	0.998435	0.022967	0.159113	0.984008	0.444353	0.92515	0.0260114	0.153499	0.909903	0.469237	1.152	0.0499956	0.184399	1.13308	0.386275	1.15252	0.0294279	0.17072	1.13838	0.394968
6	781.027	7.16633	100.945	772.509	334.356	768.482	15.2109	131.991	754.736	391.333	969.288	-46.8193	162.627	950.149	347.801	917.476	-46.6416	142.991	904.504	354.344	0.936651	0.00859427	0.121059	0.926437	0.362248	1.09929	0.0700619	0.12864	1.0851	0.412851	1.02611	-0.0352905	0.134864	1.01332	0.384658	1.09552	0.058118	0.144548	1.08355	0.379012
7	956.939	53.3918	169.901	938.194	474.11	926.369	24.5105	165.903	907.235	412.325	941.44	36.1042	151.62	926.901	436.803	966.908	57.4944	161.384	951.853	399.365	1.09252	0.0619539	0.196553	1.07048	0.399412	1.0523	0.0188037	0.191868	1.02971	0.35565	1.07148	0.0476675	0.164643	1.05585	0.412153	1.08031	0.0827222	0.180153	1.06347	0.346794
8	984.847	33.6022	178.013	966.719	403.59	1038.13	61.6354	218.842	1004.85	364.851	966.587	16.798	206.374	942.329	489.86	680.737	135.996	156.334	661.893	415.801	1.16871	0.0398754	0.211247	1.1472	0.517695	1.19669	0.0847415	0.238887	1.16533	0.431161	1.09348	0.0252647	0.220872	1.06858	0.541939	1.01434	0.0969603	0.212759	0.991064	0.508872
9	885.068	42.5985	159.335	867.578	321.576	677.081	27.2197	127.562	662.183	316.424	882.273	40.4851	109.307	874.873	337.573	765.436	35.831	114.663	756.236	321.799	1.58292	0.147709	0.327158	1.54131	0.441191	1.23472	0.0333236	0.289782	1.19238	0.431284	1.20738	0.0987434	0.162508	1.19339	0.463138	1.2523	0.134373	0.236021	1.22888	0.439866
10	1061.41	78.7095	190.142	1039.91	441.404	1089.61	29.2489	183.811	1070.89	408.858	1098.71	87.6556	98.3546	1092.5	452.045	1085.13	76.9487	148.656	1073.4	519.996	0.986299	0.0731395	0.176686	0.966321	0.408693	1.0142	0.0120516	0.192308	0.986815	0.373294	0.991359	0.0648279	0.158873	0.976543	0.433426	0.816464	0.0773918	0.131045	0.803501	0.407646
11	885.171	43.7617	131.527	872.614	403.836	856.221	20.7978	138.973	838.491	393.579	1026.65	39.5579	140.658	1016.29	367.124	1144.66	91.1842	122.338	1137.08	377.049	1.06783	0.052792	0.158668	1.05268	0.512525	1.09776	0.0369106	0.187673	1.07673	0.507463	1.3212	0.103118	0.141014	1.31124	0.48658	1.22455	0.126512	0.166968	1.21128	0.50039
12	1043.5	98.4242	214.871	1015.91	379.044	897.599	26.4991	209.644	867.116	400.326	876.601	66.7873	118.344	866.445	361.837	909.44	96.8929	173.226	892.135	349.016	1.21152	0.114272	0.249468	1.17948	0.428905	0.983792	0.0246735	0.209275	0.953896	0.447112	1.07799	0.04369	0.13015	1.06812	0.435851	1.14705	0.111237	0.185276	1.12962	0.417674

## Sheet: tables 5&6
	Fixation - applied force, resultant velocity and resultant GRF of the downwards phase.				Midpoint - applied force, resultant velocity and resultant GRF of the downwards phase.				Peak velocity - applied force, resultant velocity and resultant GRF of the downwards phase.				Peak acceleration - applied force, resultant velocity and resultant GRF of the downwards phase.				Peak GRF - applied force, resultant velocity and resultant GRF of the downwards phase.				lowest point - applied force, resultant velocity and resultant GRF of the downwards phase.				End of the back swing - applied force, resultant velocity and resultant GRF.				Lowest point - applied force, resultant velocity and resultant GRF of the upwards phase.				Peak GRF- applied force, resultant velocity and resultant GRF of the upwards phase.				Max acceleration- applied force, resultant velocity and resultant GRF of the upwards phase.				Max velocity- applied force, resultant velocity and resultant GRF of the upwards phase.				Midpoint- applied force, resultant velocity and resultant GRF of the upwards phase.
Subject	Time (swing relative)	CoG speed (m/s)	Applied force (N)	GRF (N)	Time (swing relative)	CoG speed (m/s)	Applied force (N)	GRF (N)	Time (swing relative)	CoG speed (m/s)	Applied force (N)	GRF (N)	Time (swing relative)	CoG speed (m/s)	Applied force (N)	GRF (N)	Time (swing relative)	CoG speed (m/s)	Applied force (N)	GRF (N)	Time (swing relative)	CoG speed (m/s)	Applied force (N)	GRF (N)	Time (swing relative)	CoG speed (m/s)	Applied force (N)	GRF (N)	Time (swing relative)	CoG speed (m/s)	Applied force (N)	GRF (N)	Time (swing relative)	CoG speed (m/s)	Applied force (N)	GRF (N)	Time (swing relative)	CoG speed (m/s)	Applied force (N)	GRF (N)	Time (swing relative)	CoG speed (m/s)	Applied force (N)	GRF (N)	Time (swing relative)	CoG speed (m/s)	Applied force (N)	GRF (N)
1	-1.93078	0.0637251	234.642	1004.14	-0.669944	3.57192	257.767	718.317	-0.561611	3.90223	422.581	1113.42	-0.436	2.99006	829.439	1616.18	-0.388333	2.54002	746.357	1730.73	-0.355278	2.32378	670.456	1679.16	0	0.192218	102.407	691.355	0.306722	2.54458	734.747	1675.79	0.333556	2.80765	786.626	1700.28	0.383333	3.29154	833.642	1627.46	0.512667	4.05064	513.125	985.896	0.599278	3.72143	250.66	732.021
2	-1.11757	0.620028	187.812	1063.6	-0.563679	3.88838	224.169	743.046	-0.520357	3.99643	395.972	1021.25	-0.397929	3.09619	976.507	2217.06	-0.375714	2.93087	950.008	2273.91	-0.325929	2.67612	819.959	2078.35	0	0.293741	61.9376	760.76	0.362786	2.99003	969.772	2274.7	0.341643	2.82823	893.49	2303.71	0.394571	3.28323	1019.87	2173.39	0.533286	4.25028	560.839	971.732	0.633107	3.95226	336.705	770.169
3	-1.25553	0.491371	197.305	903.111	-0.590467	3.49829	211.329	651.636	-0.530667	3.64146	405.197	870.365	-0.3848	2.91051	779.732	1513.5	-0.386533	2.92468	769.038	1526.01	-0.3008	2.3252	621.015	1389.34	0	0.159483	140.3	792.66	0.277733	2.54692	756.35	1733.53	0.2534	2.28669	677.656	1770.54	0.329533	3.12326	827.101	1512.9	0.460933	3.91772	592.465	899.685	0.561667	3.56023	313.467	796.706
4	-1.51712	0.244962	230.359	1006.33	-0.604494	3.86476	293.831	1082.7	-0.560674	3.95482	489.566	1097.86	-0.421708	3.38633	899.914	1048.45	-1.24962	0.881532	259.05	1672.18	-0.356854	2.96582	806.6	1013.33	0	0.34238	88.4613	950.884	0.318091	3.19927	809.322	985.685	0.688736	1.62953	327.552	1411.69	0.381682	3.73862	911.233	988.776	0.497227	4.32734	633.667	994.341	0.600636	3.89807	304.011	1014.37
5	-2.10057	0.0586752	229.41	1076.48	-0.601238	3.62458	393.716	903.956	-0.560095	3.66867	505.887	1134.56	-0.39019	3.28367	772.3	1642.36	-0.366571	3.19082	736.05	1703.27	-0.331952	3.05313	707.992	1664.1	0	0.241924	128.628	922.157	0.333667	3.55904	959.227	1899.59	0.334095	3.55915	956.501	1912.76	0.376905	3.97081	1045.77	1810.13	0.47981	4.53384	704.24	1176.23	0.608095	3.8746	326.101	866.912
6	-1.992	0.406789	217.797	1056.8	-0.608148	3.10024	237.563	754.081	-0.458074	3.66361	455.544	1237.38	-0.331407	2.99916	720.509	1555.62	-0.32637	2.90724	685.219	1630.98	-0.228074	2.09568	563.172	1379.61	0	0.127907	208.399	1162.32	0.230741	2.24898	596.343	1534.14	0.279778	2.81024	712.753	1606.41	0.351926	3.60591	816.338	1444.1	0.456963	4.21237	590.075	951.03	0.536148	3.904	318.119	823.331
7	-1.22212	0.442773	227.731	1269.82	-0.558784	3.81905	340.846	1121.71	-0.449059	4.35233	623.789	1281.56	-0.35651	3.92852	868.144	1734.93	-0.314392	3.61631	820.62	1843.74	-0.26051	3.14137	720.872	1725.16	0	0.371562	160.859	1310.48	0.329294	3.17264	747.326	1611.29	0.378196	3.55883	766.535	1658.1	0.435412	3.98358	807.913	1594.05	0.525255	4.24742	696.964	1493.32	0.612627	3.96152	401.457	1103.35
8	-1.82111	0.0692	236.858	1062.29	-0.63166	3.54939	284.877	822.579	-0.567787	3.68465	504.992	1251.69	-0.430553	3.3801	743.887	1611.31	-0.438894	3.42829	733.777	1631.76	-0.340596	2.96651	680	1481.98	0	0.148358	91.8226	891.929	0.409447	3.11924	808.689	1899.89	0.419617	3.1887	822.991	1910.7	0.471149	3.55938	865.631	1833.54	0.626894	4.33762	532.918	1046.46	0.695191	4.14873	312.055	696.015
9	-1.93	0.064517	231.446	958.235	-0.552706	3.53522	267.286	761.278	-0.484294	3.72087	501.675	1105.28	-0.364118	3.24654	760.753	1362.17	-0.344235	3.08961	716.531	1409.96	-0.257471	2.39294	593.767	1269.05	0	0.12793	194.186	966.808	0.275647	2.49185	625.005	1397.41	0.333941	2.95173	733.544	1464.58	0.358118	3.1413	754.942	1442.3	0.484588	3.67405	527.902	1047.1	0.575765	3.38489	263.991	726.33
10	-2.74665	0.130388	229.255	1160.74	-0.620774	3.68199	270.712	1034.85	-0.563161	3.77161	454.649	1336.92	-0.423548	3.2302	814.205	1972.83	-0.412065	3.06757	792.018	1898	-0.344323	2.74932	701.771	1747.33	0	0.140921	121.569	1014.38	0.309806	2.97788	798.96	1865.1	0.294194	2.96153	769.141	1899.93	0.374194	3.60179	911.894	1775.5	0.484516	4.2547	600.585	1198.86	0.579161	3.90889	300.632	856.595
11	-1.8925	0.191644	230.702	1039.8	-0.598111	3.70592	276.509	949.488	-0.554056	3.80754	478.415	1362.3	-0.431222	3.36098	855.617	1914.94	-0.0242778	3.2583	831.337	1850.26	-0.346	2.9267	763.989	1654.56	0	0.203882	121.196	892.823	0.358056	2.99064	798.725	1624.27	0.378278	3.1153	806.049	1659.01	0.429389	3.50091	895.149	1601.19	0.547833	4.05709	570.853	1177.57	0.619778	3.80819	298.107	760.697
12	-1.21804	0.578274	212.636	1046.7	-0.59651	3.60224	349.277	847.343	-0.594235	3.607	355.255	861.186	-0.442353	3.02282	758.562	1740.74	-0.410745	2.90466	740.702	1789.39	-0.344941	2.67841	676.49	1698.72	0	0.167151	103.311	933.891	0.316549	2.96818	855.435	1906.38	0.316706	2.96947	851.404	1919.73	0.363686	3.36967	929.304	1802.16	0.486314	4.02768	624.026	1201.6	0.56851	3.75669	337.34	911.631

## Sheet: Hand grip strength
Hand grip strength
Subjects	Pre (kg)	Post (kg)
1	45	41.5
2	64.5	51
3	55	50
4	60	50
5	55	45
6	61	47
7	66	60
8	57	40
9	49	39.5
10	54.5	51
11	67	53
12	56	45
